# Supplementary material for: Cellular Dynamics of Mouse Trophoblast Stem Cells: Identification of a Persistent Stem Cell Type
Source: PubMed Central journal article supplement — Biol Reprod. 2016 Jun 1;94(6):122, 1-14. doi: 10.1095/biolreprod.115.137125 (PMC6702784; doi:10.1095/biolreprod.115.137125), 2016-06-01
Supplement: biolreprod.115.137125-6.pdf [file biolreprod.115.137125-6.pdf]

Motomura et al., Supplemental Table S1. The size of individual cells composing each colony type in the B6TS4 line (corresponding to Figure S1B).<sup>a</sup>

| Colony type | Cell diameter ( $\mu\text{m}$ ) |         |       | No. of cells analyzed |
|-------------|---------------------------------|---------|-------|-----------------------|
|             | Minimum                         | Maximum | Mean  |                       |
| Type 1      | 6.75                            | 17.14   | 13.11 | 46                    |
| Type 2      | 6.36                            | 25.21   | 13.65 | 37                    |
| Type 3      | 10.72                           | 27.18   | 15.92 | 50                    |
| Type 4      | 10.54                           | 24.58   | 15.56 | 312                   |
| Type 5      | 10.54                           | 28.03   | 16.39 | 58                    |

<sup>a</sup>The results of statistical analysis are shown in Figure S1B.
